# Supplementary material for: Enhanced Electrochemical Performance of LiNi0.5Mn1.5O4 Composite Cathodes for Lithium-Ion Batteries by Selective Doping of K+/Cl− and K+/F−
Source: MDPI journal article supplement (doi:10.3390/nano11092323), 2021-09-07
Supplement: s1 [file s1]

# Supplementary Materials: Enhanced Electrochemical Performance of $\text{LiNi}_{0.5}\text{Mn}_{1.5}\text{O}_4$ Composite Cathodes for Lithium-Ion Batteries by Selective Doping of $\text{K}^+/\text{Cl}^-$ and $\text{K}^+/\text{F}^-$

Aijia Wei <sup>1,2,3</sup>, Jinping Mu <sup>1,2</sup>, Rui He <sup>2,3</sup>, Xue Bai <sup>2,3</sup>, Xiaohui Li <sup>2,3</sup>, Lihui Zhang <sup>2,3</sup>, Yanji Wang <sup>1</sup>, Zhenfa Liu <sup>1,2,3,\*</sup> and Suning Wang <sup>4</sup>

<sup>1</sup> School of Chemical Engineering and Technology, Hebei University of Technology, Tianjin 300130, China; weiaijia2012@126.com (A.W.); mu18822033042@sina.com (J.M.); yjwang@hebut.edu.cn (Y.W.)

<sup>2</sup> Institute of Energy Resources, Hebei Academy of Sciences, Shijiazhuang, Hebei Province 050081, PR China; kxyherui@163.com (R.H.); bx\_ier@yeah.net (X.B.); nys2009@163.com (X.L.); zlhkxy@sohu.com (L.Z.)

<sup>3</sup> Hebei Technology Innovation Center for functional material of lithium battery electrolyte, Shijiazhuang, Hebei Province 050081, PR China.

<sup>4</sup> Guangxi Key Laboratory of Optical and Electronic Materials and Devices, College of Materials Science and Engineering, Guilin University of Technology, Guilin 541004, China; wangsuning0124@outlook.com

\* Correspondence: liuzhenfa@hebut.edu.cn

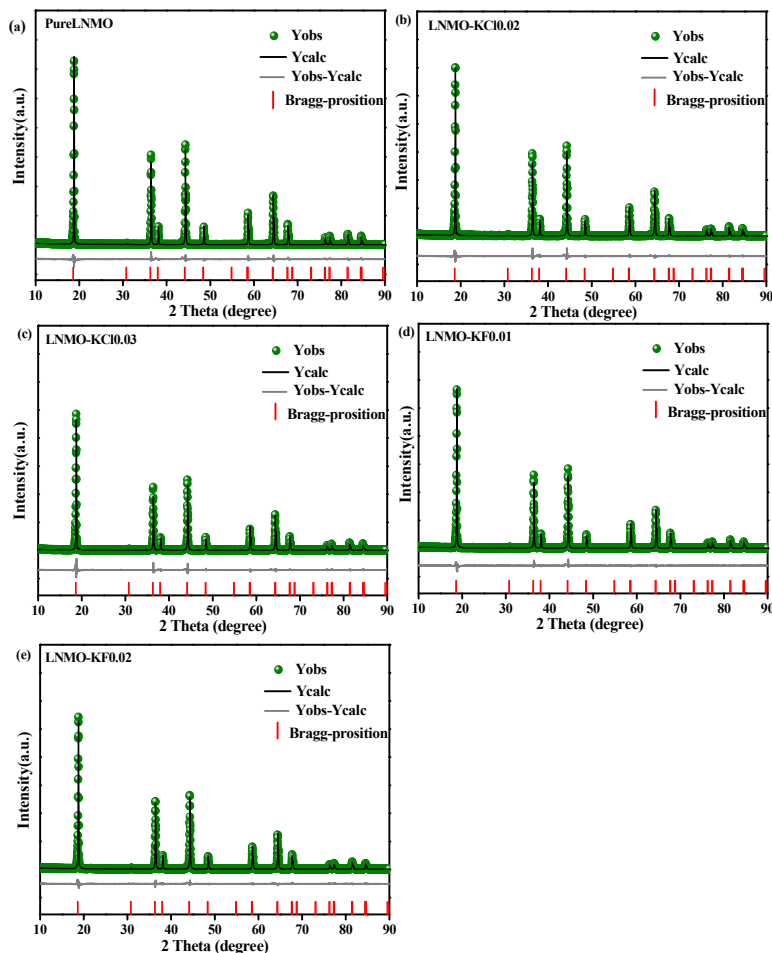

**Figure S1.** Rietveld refinement results of XRD patterns of pure LNMO (a), LNMO-KCl0.02 (b), LNMO-KCl0.03 (c), LNMO-KF0.01 (d), and LNMO-KF0.02 (e).

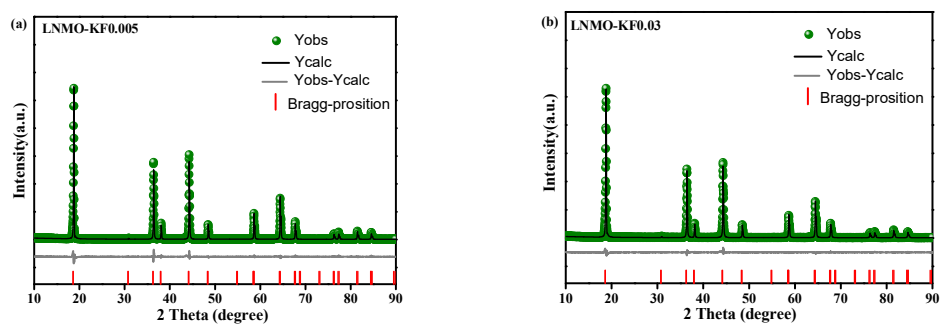

**Figure S2.** Rietveld refinement results of XRD patterns of LNMO-KF0.005 (a) and LNMO-KF0.03 (b).

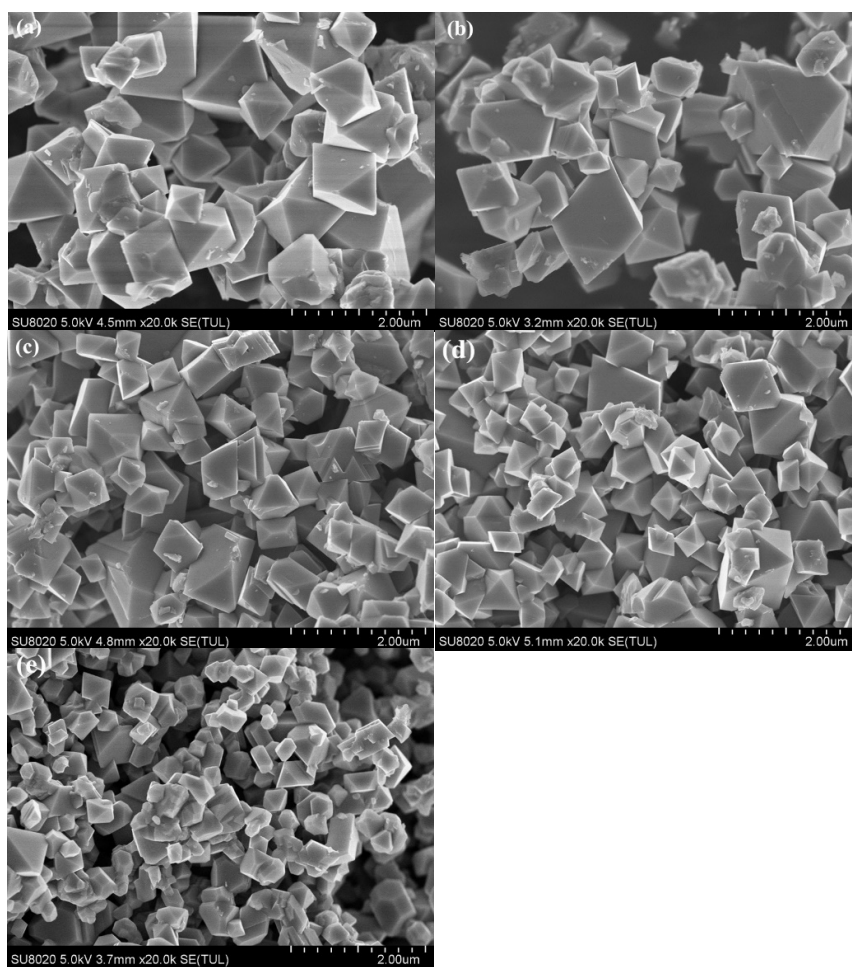

**Figure S3.** SEM images of pure LNMO (a), LNMO-KCl0.02 (b), LNMO-KCl0.03 (c), LNMO-KF0.01 (d), and LNMO-KF0.02 (e).

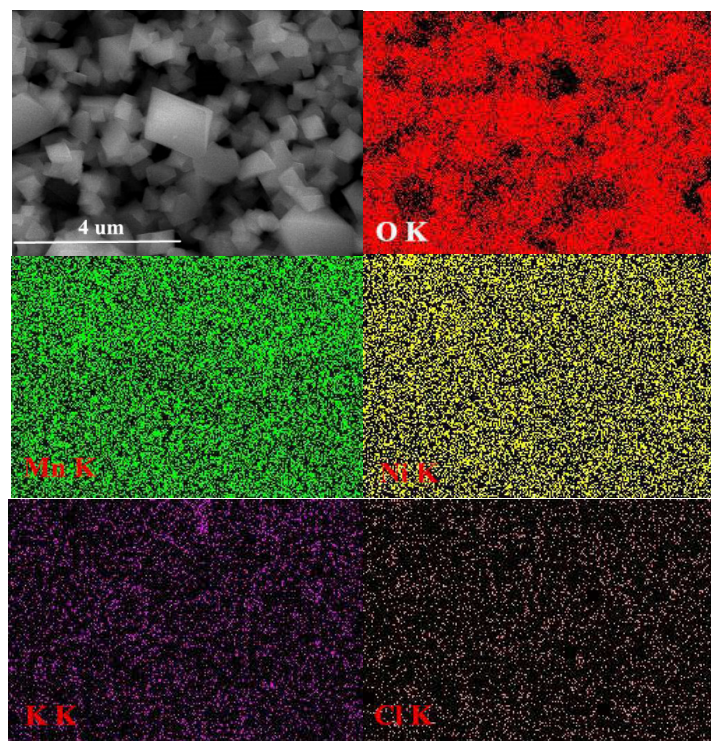

**Figure S4.** EDS images and the corresponding element mapping of O, Ni, Mn, K, and Cl for LNMO-KCl0.03.

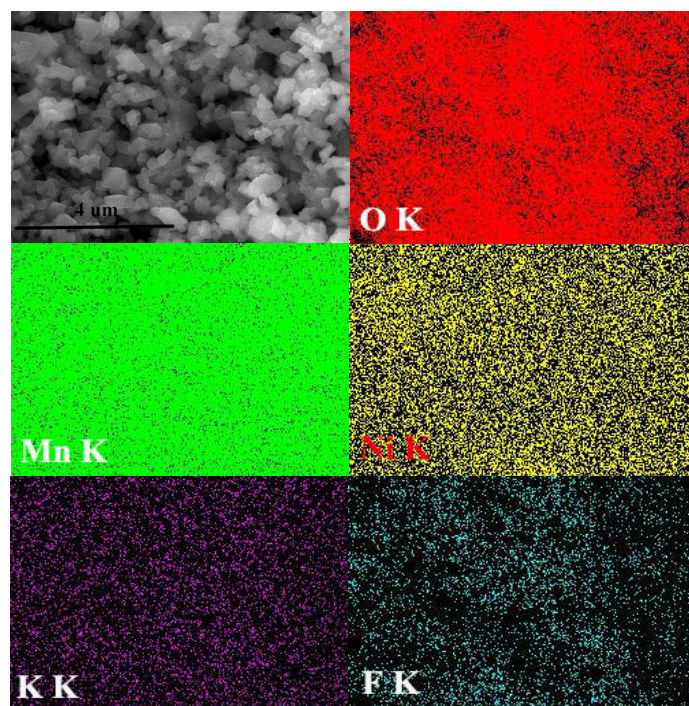

**Figure S5.** EDS images and the corresponding element mapping of O, Ni, Mn, K, and F for LNMO-KF0.02.

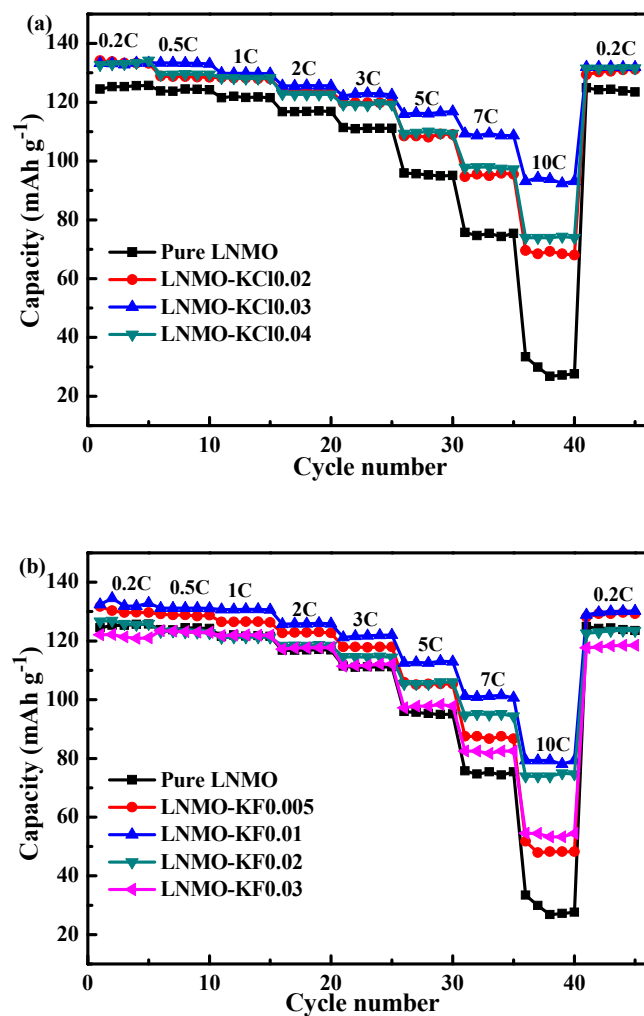

**Figure S6.** Rate capability of the samples for pure LNMO, LNMO-KCl0.02, LNMO-KCl0.03, and LNMO-KCl0.04 from 0.2 C to 10 C (a); Rate capability of the samples for pure LNMO, LNMO-KF0.005, LNMO-KF0.01, LNMO-KF0.02, and LNMO-KF0.03 from 0.2 C to 10 C (b).

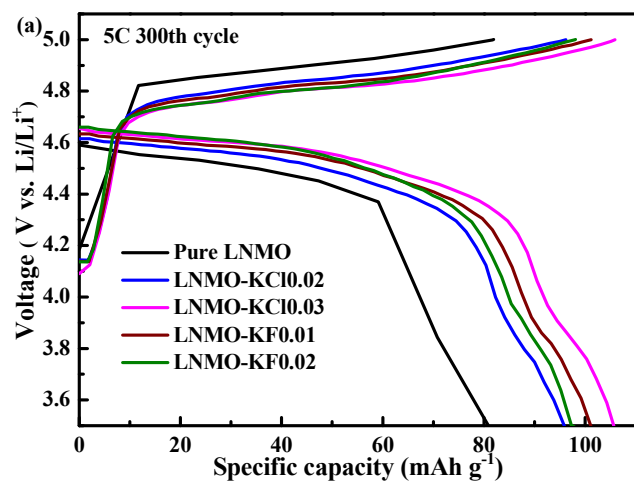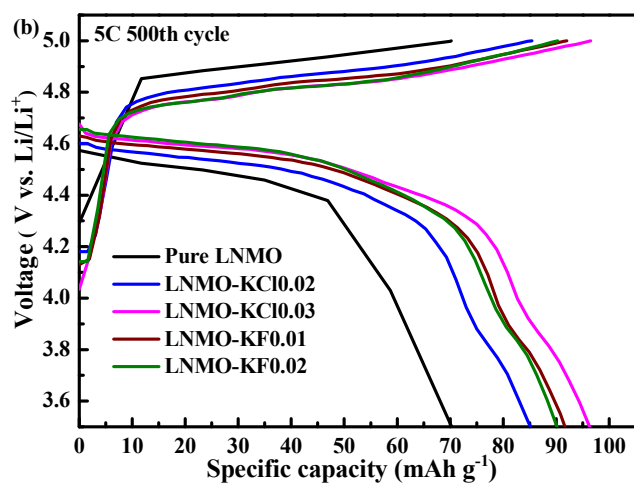

**Figure S7.** The charge/discharge curves of all the samples in the 300th cycle (a) and 500th cycle (b) at 5C.
